# Supplementary material for: Conversion of sawdust residuals to activated-carbon-supported pure nickel nanoparticles as a novel composite membrane for simultaneous hydrogen separation and storage
Source: Royal Society of Chemistry journal article supplement (doi:10.1039/d3nj02937a), 2023-01-01
Supplement: d3nj02937a1.pdf [file d3nj02937a1.pdf]

**Supporting Information**

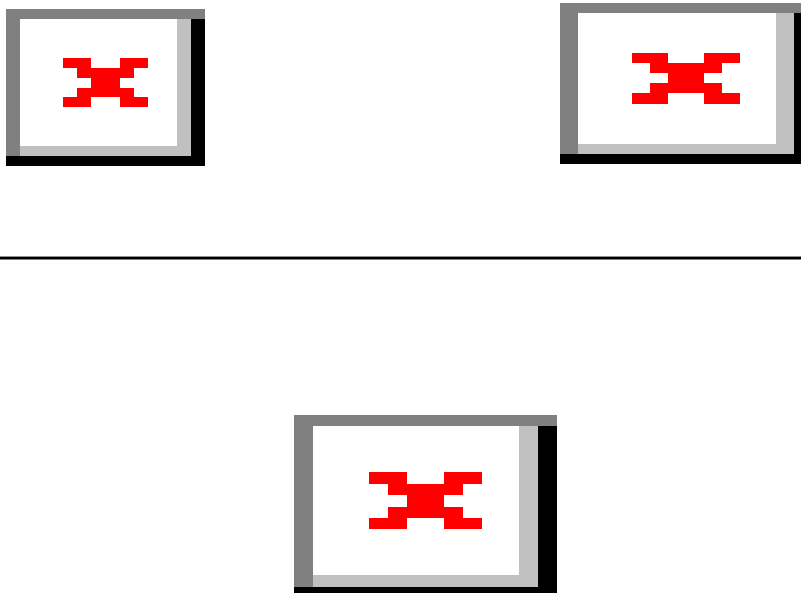

*Figure S1. Membrane reactor and hydrogen separation system .*

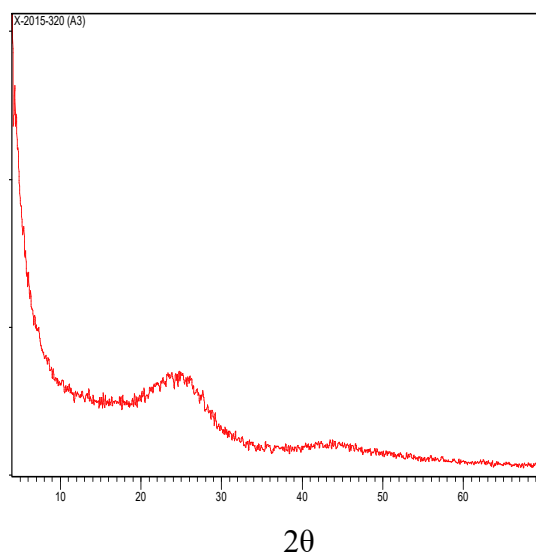

*Figure S2. XRD pattern of activated carbon.*

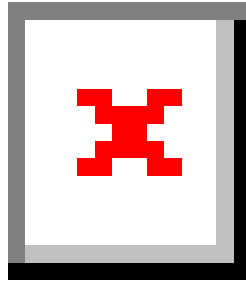

*Figure S3. FT-IR Spectrum of the raw activated carbon*

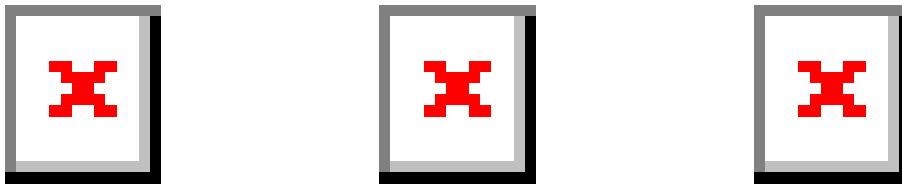

*Figure S4. TEM micrographs of the freshly made activated carbon*

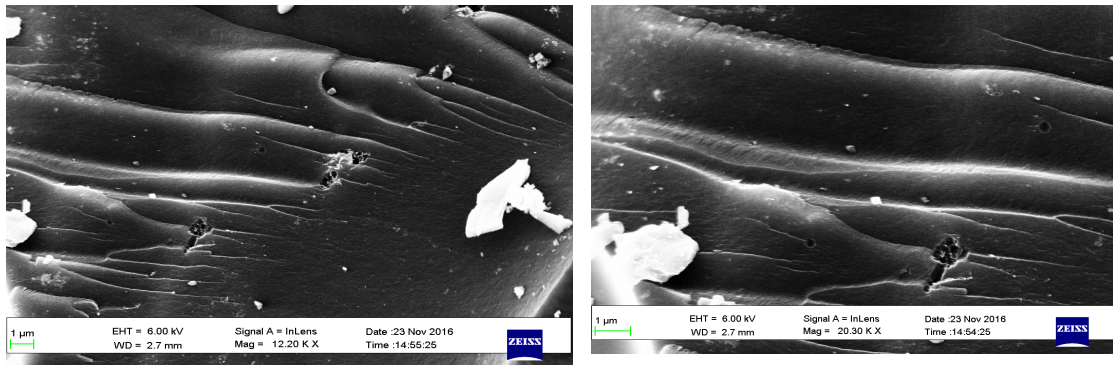

*Figure S5. Surface morphology of the as-prepared activated carbon*

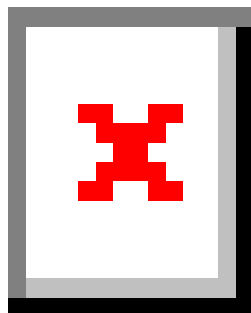

*Figure S6. TGA profile of the freshly mad activated carbon*

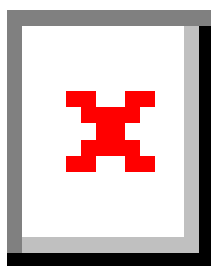

*Figure S7. Raman spectroscopy of the as-prepared activated carbon*
